# Supplementary material
Source: PubMed Central journal article supplement (PMC2878517)

**A**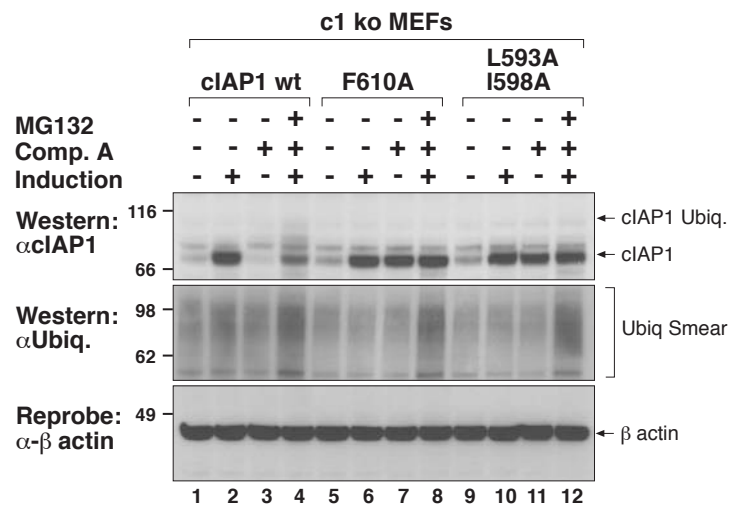**Supplementary Figure 1**

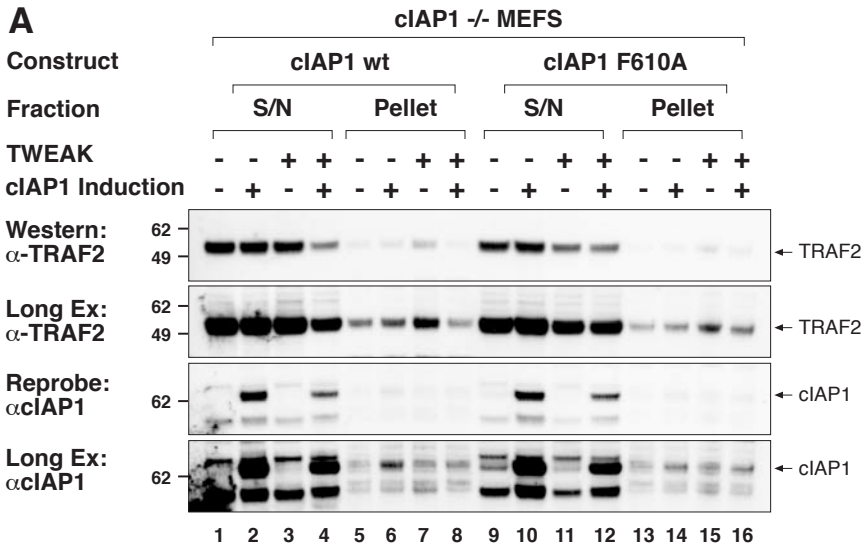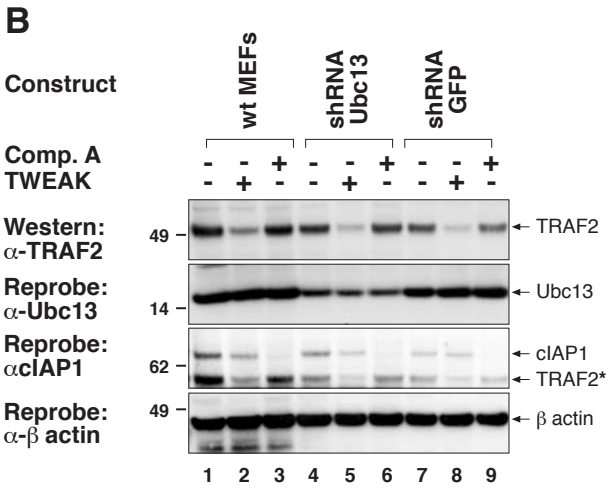

Supplementary Figure 2

**A**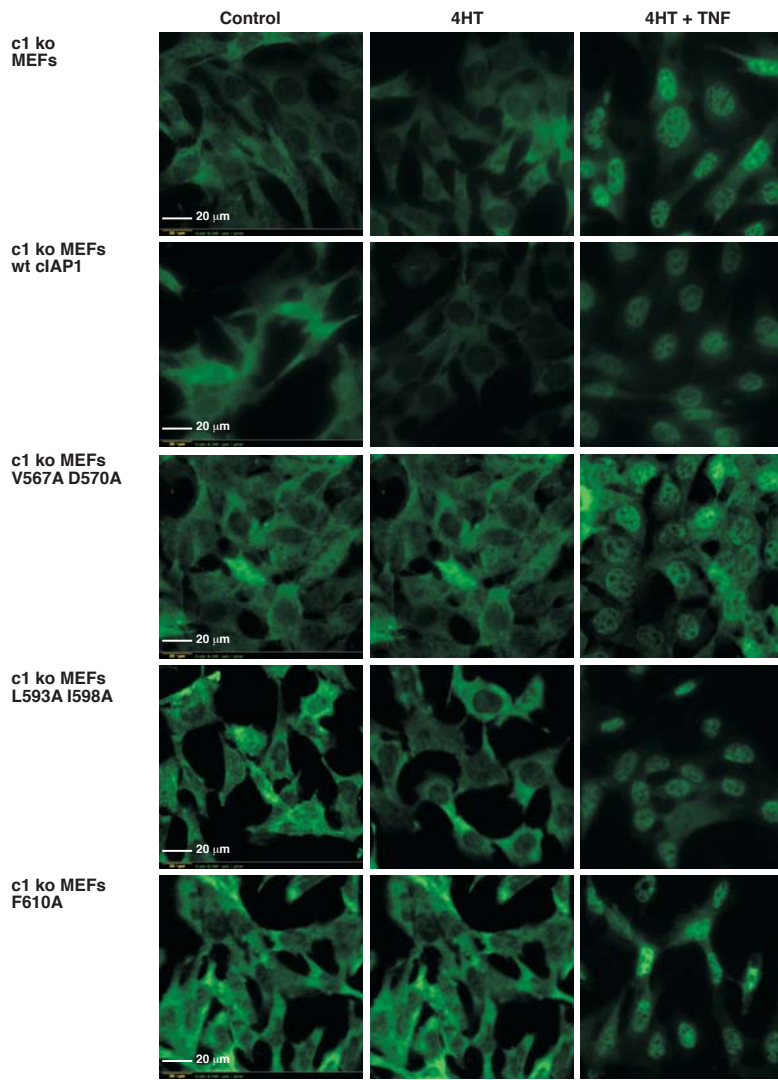**B**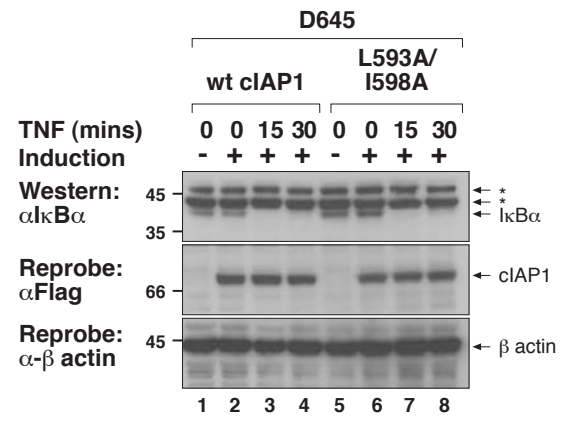

Supplementary Figure 3

Supplement: supp_M109.087635_Supplemental_Feltham.pdf [file supp_M109.087635_Supplemental_Feltham.pdf]
